# Supplementary material for: Preferential Activation of the Hedgehog Pathway by Epigenetic Modulations in HPV Negative HNSCC Identified with Meta-Pathway Analysis
Source: PubMed Central journal article supplement (PMC3817178; doi:10.1371/journal.pone.0078127), 2013-11-04

**(a) GLI1 expression in HPV-negative HNSCC**

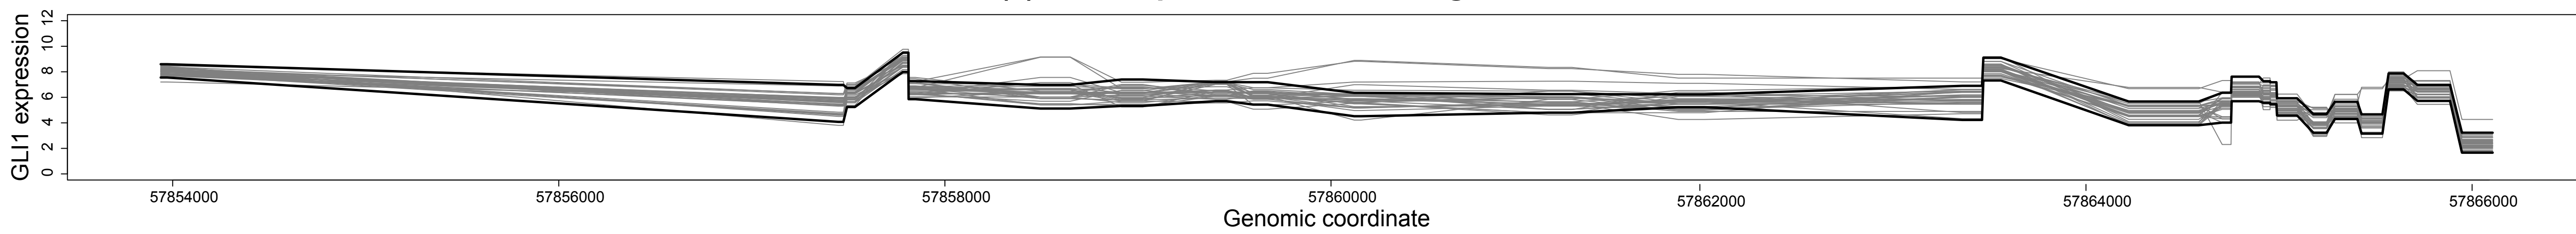

**(b) GLI1 expression in HPV-positive HNSCC**

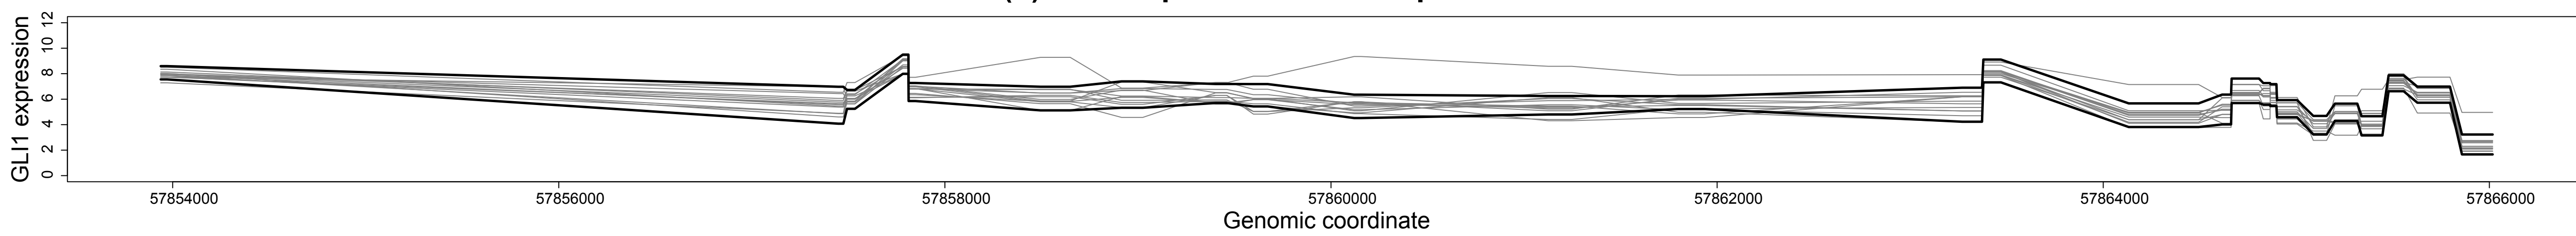

**(c) GLI1 exons**

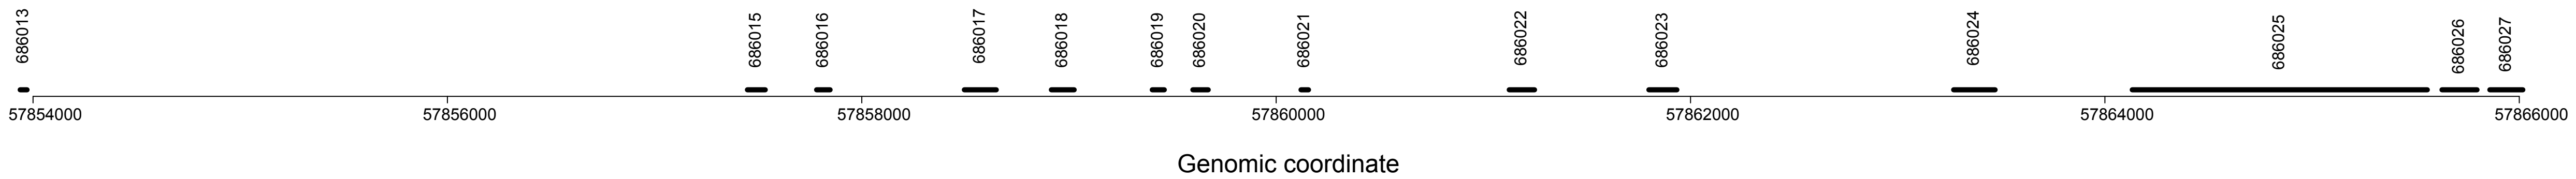

**(d) Waterfall plots of GLI1 expression by Exon**

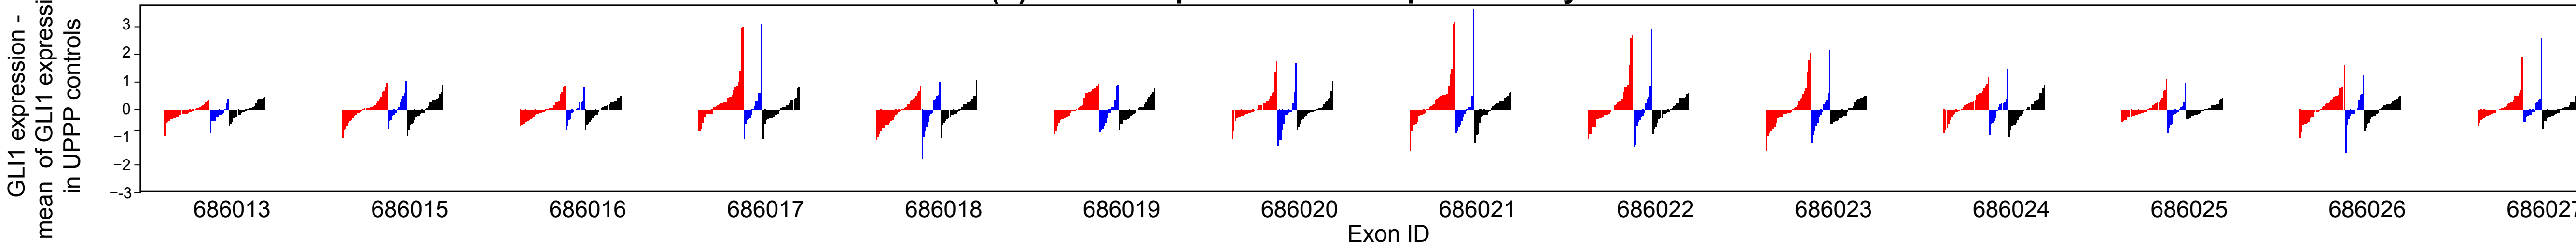

**(e) CTNNB1 expression in HPV-negative HNSCC**

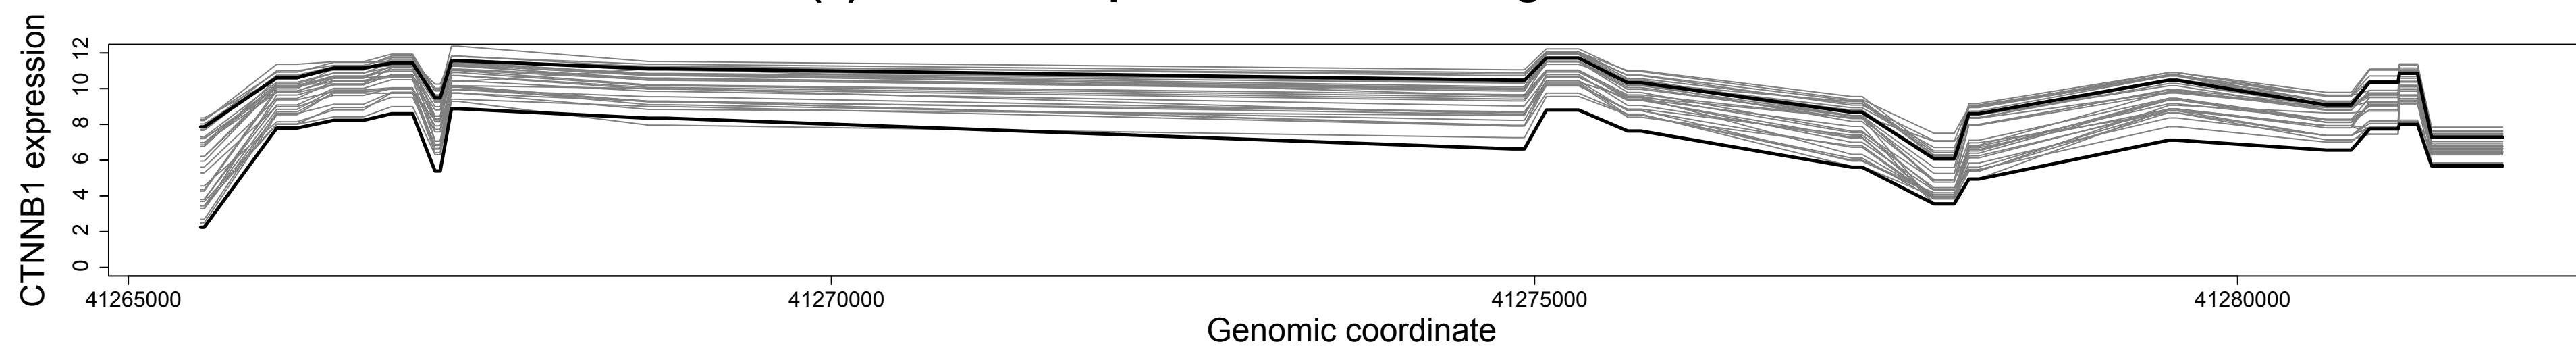

**(f) CTNNB1 expression in HPV-positive HNSCC**

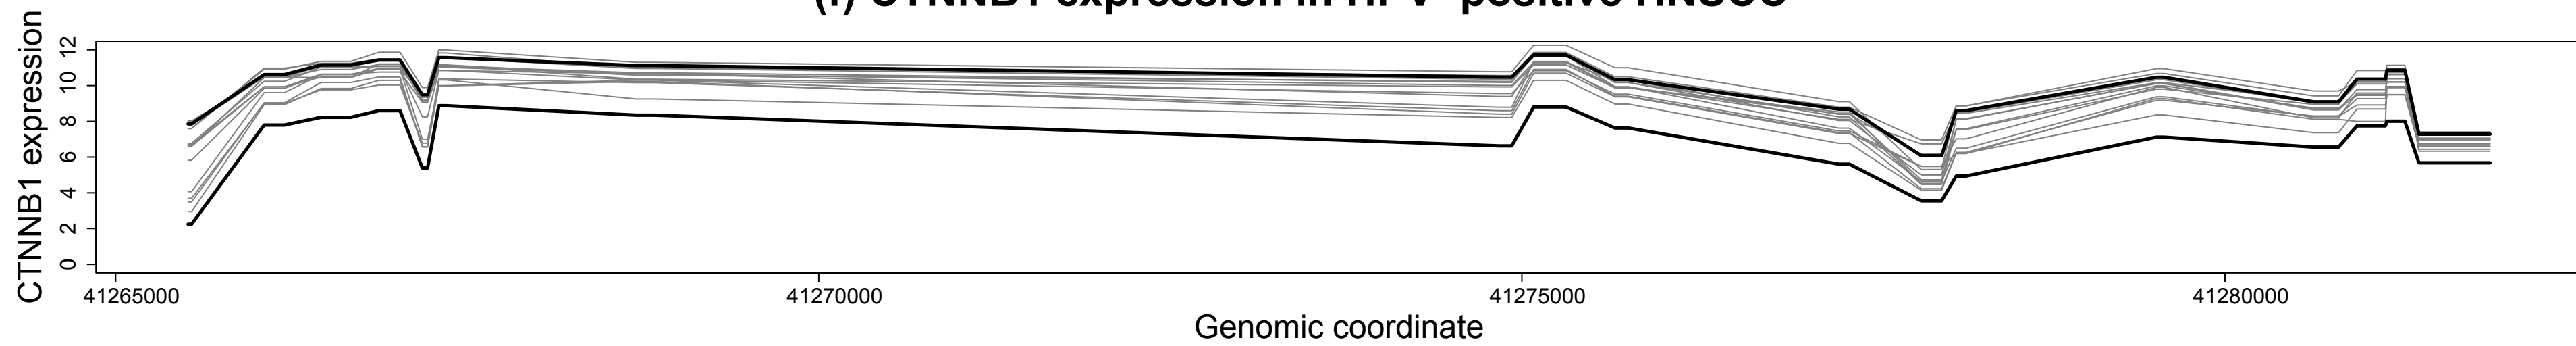

**(g) CTNNB1 exons**

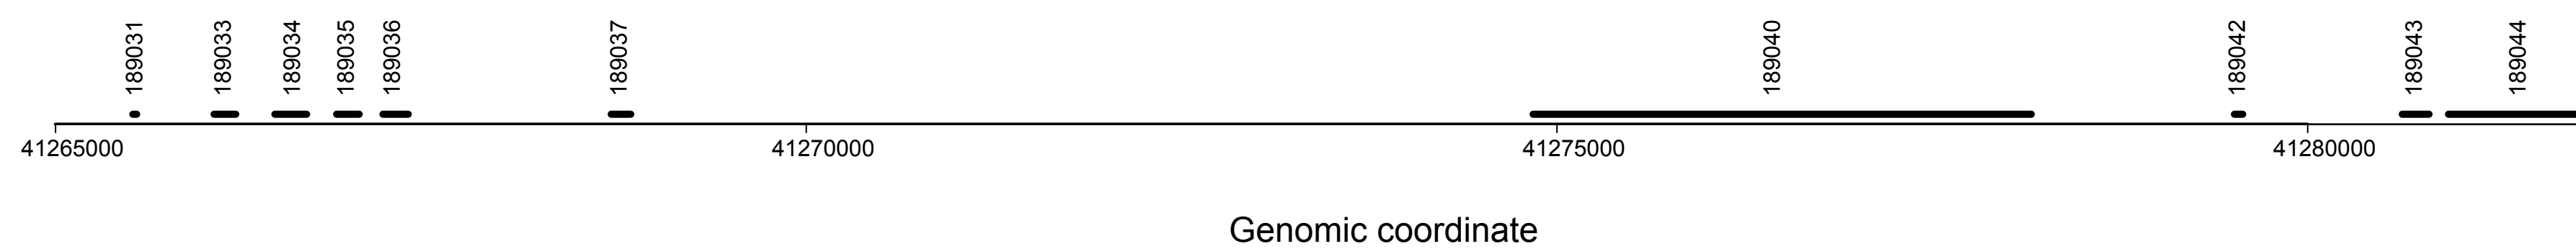

**(h) Waterfall plots of CTNNB1 expression by Exon**

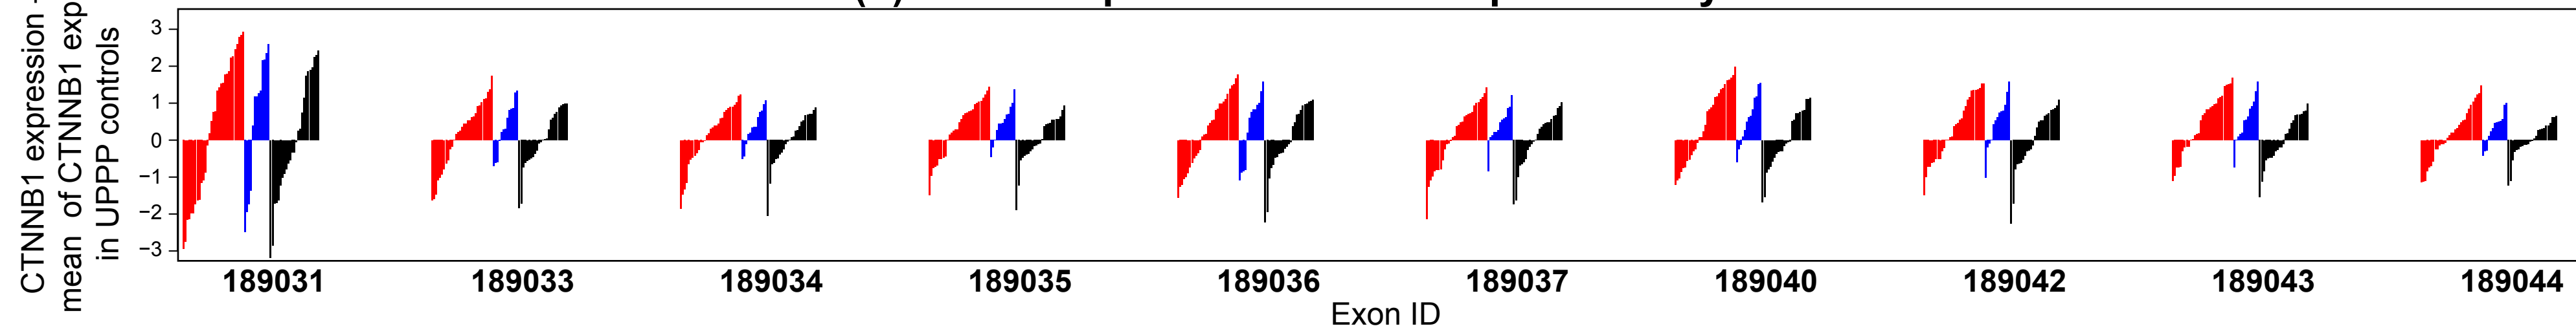

Supplement: pone.0078127.s004.pdf [file pone.0078127.s004.pdf]
