# Supplementary material for: Preferential Activation of the Hedgehog Pathway by Epigenetic Modulations in HPV Negative HNSCC Identified with Meta-Pathway Analysis
Source: PubMed Central journal article supplement (PMC3817178; doi:10.1371/journal.pone.0078127), 2013-11-04

A

GLI1. RNA seq data

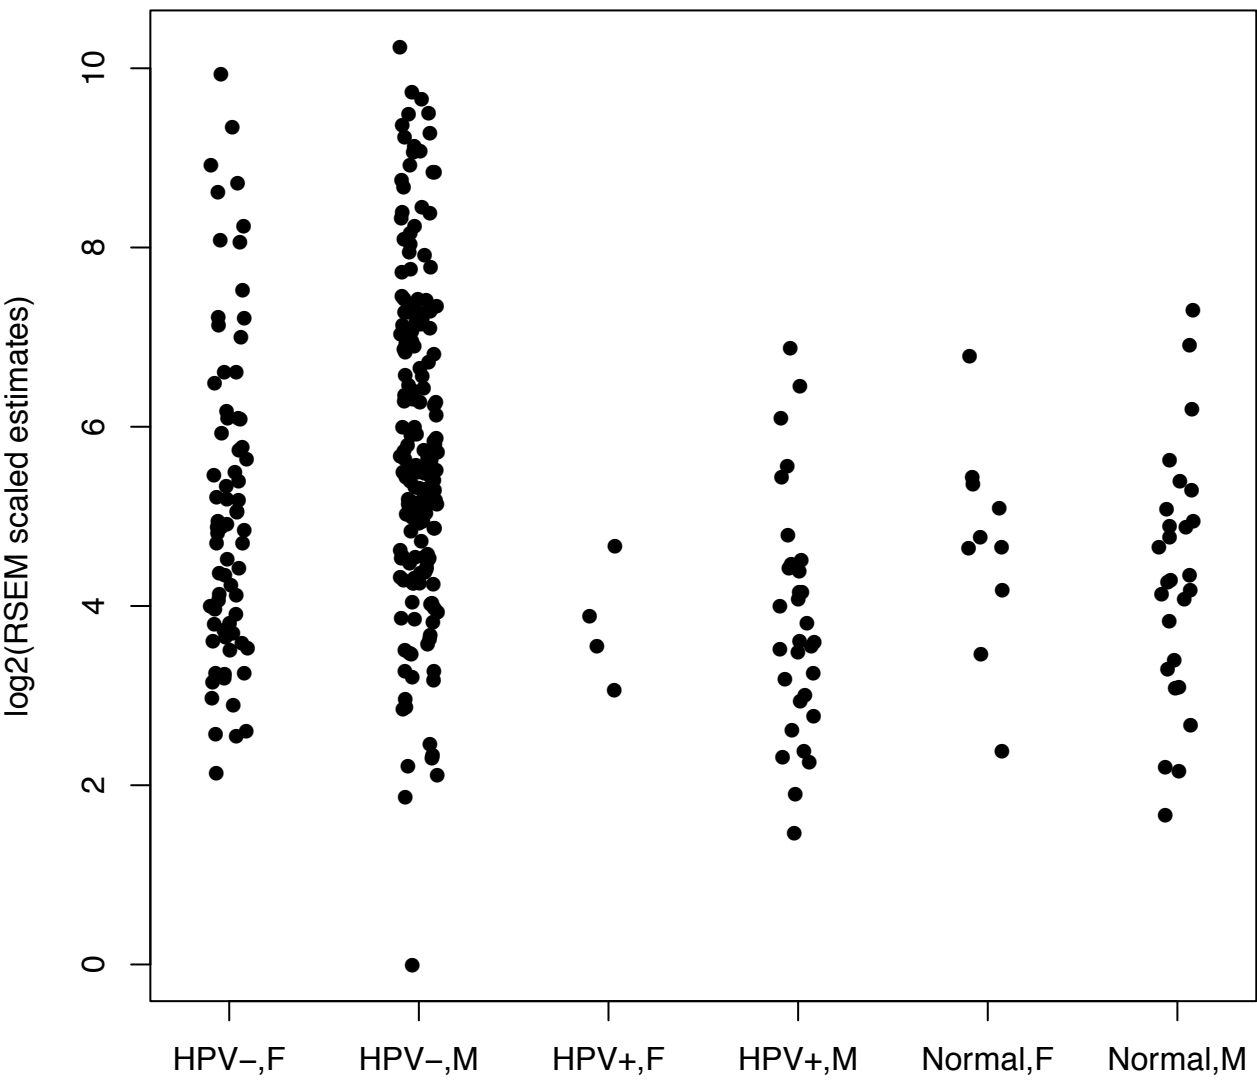

B

CTNNB1. RNA seq data

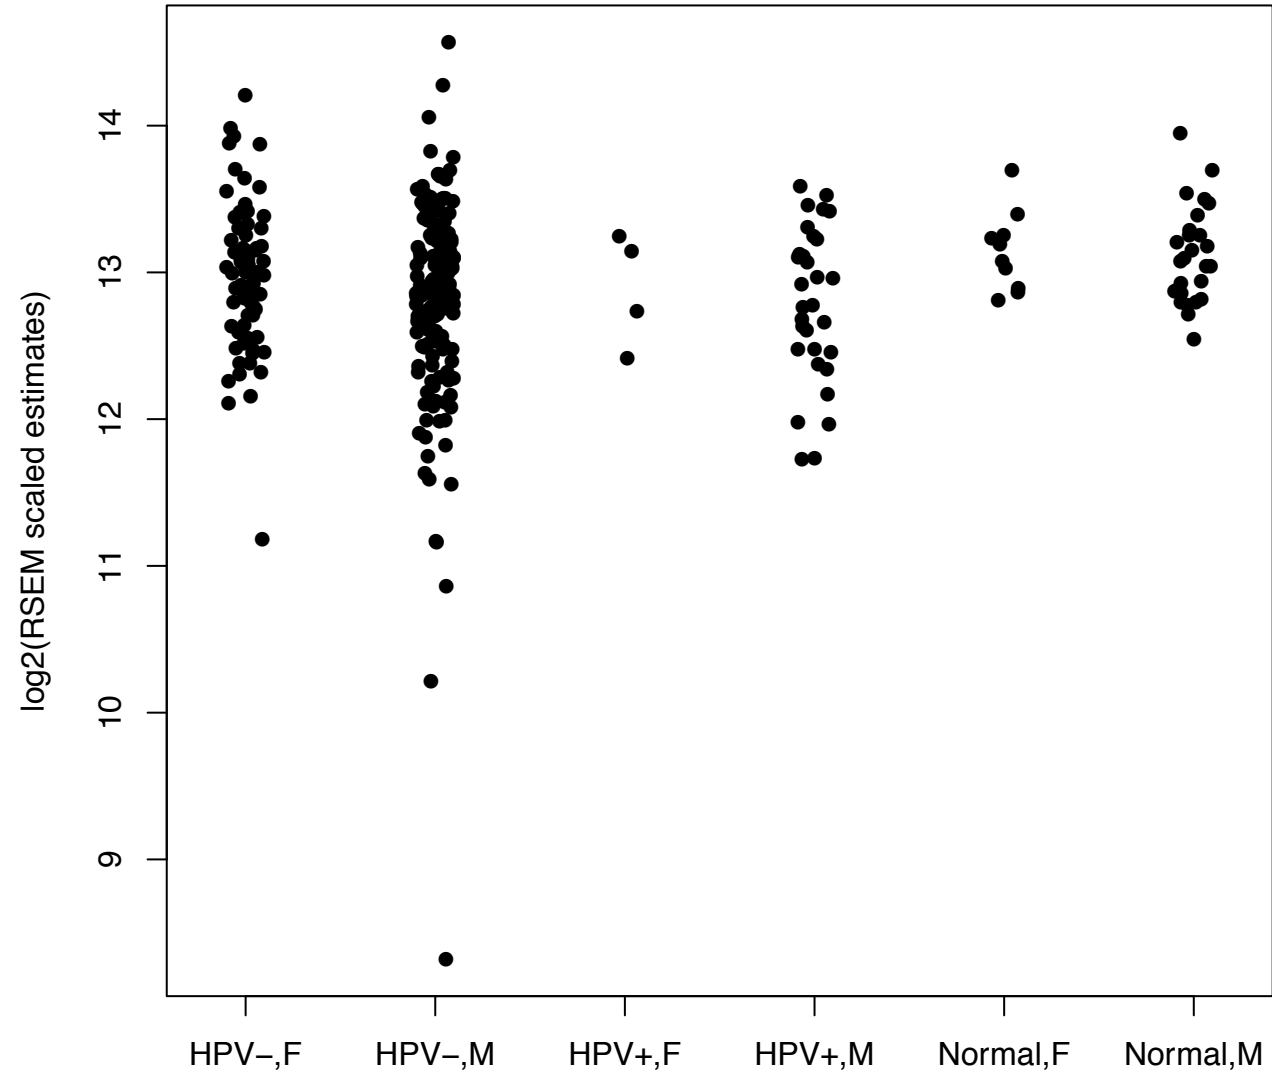

Supplement: pone.0078127.s005.pdf [file pone.0078127.s005.pdf]
